# Supplementary material
Source: publisher figshare collection journal article supplement (https://asha.figshare.com/articles/dataset/_/23669214)
Supplement: Supplementary file 1 [file 1]

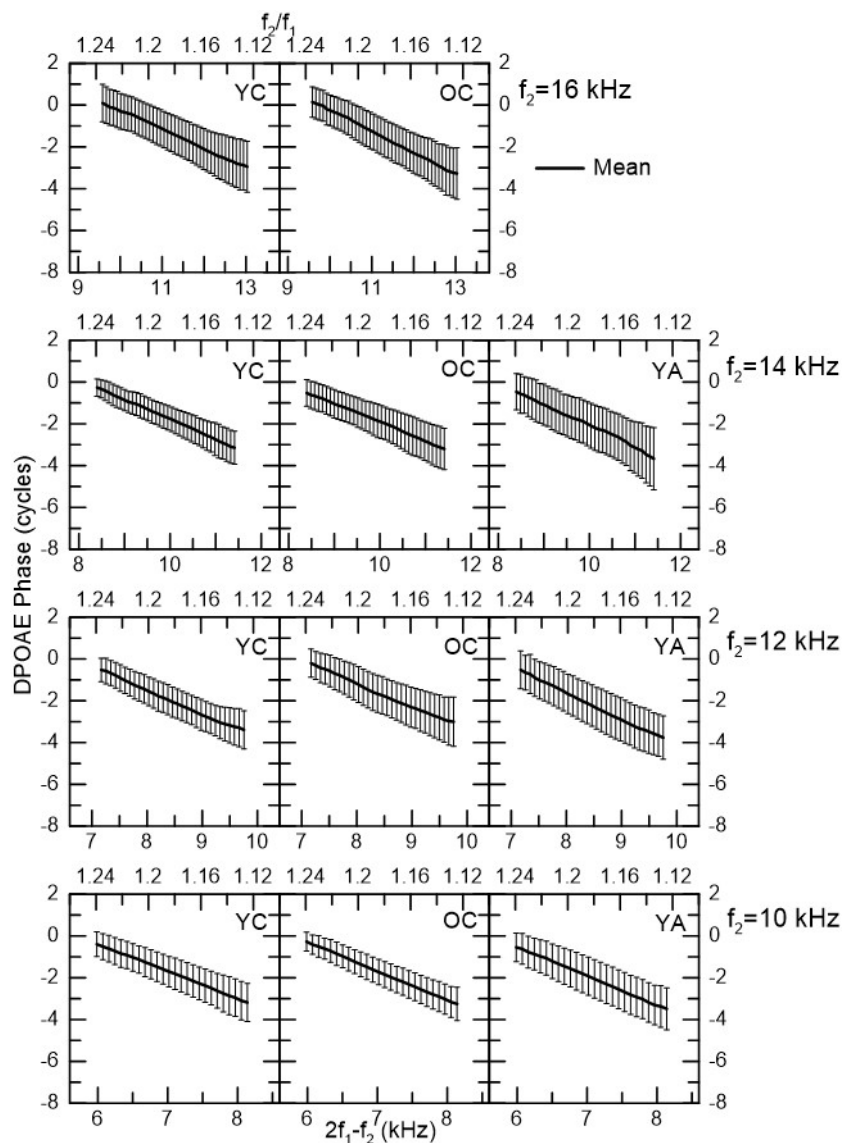

### Supplemental Material S3. DPOAE mean phase for high frequencies.

This is the same as Supplemental Material S1 except DPOAE mean phase results are plotted for high frequencies ( $f_2 = 16$  kHz in top row, 10 kHz bottom row) for each age group (columns).
