# Supplementary material
Source: publisher figshare collection journal article supplement (https://asha.figshare.com/articles/dataset/_/23669214)
Supplement: Supplementary file 2 [file 1]

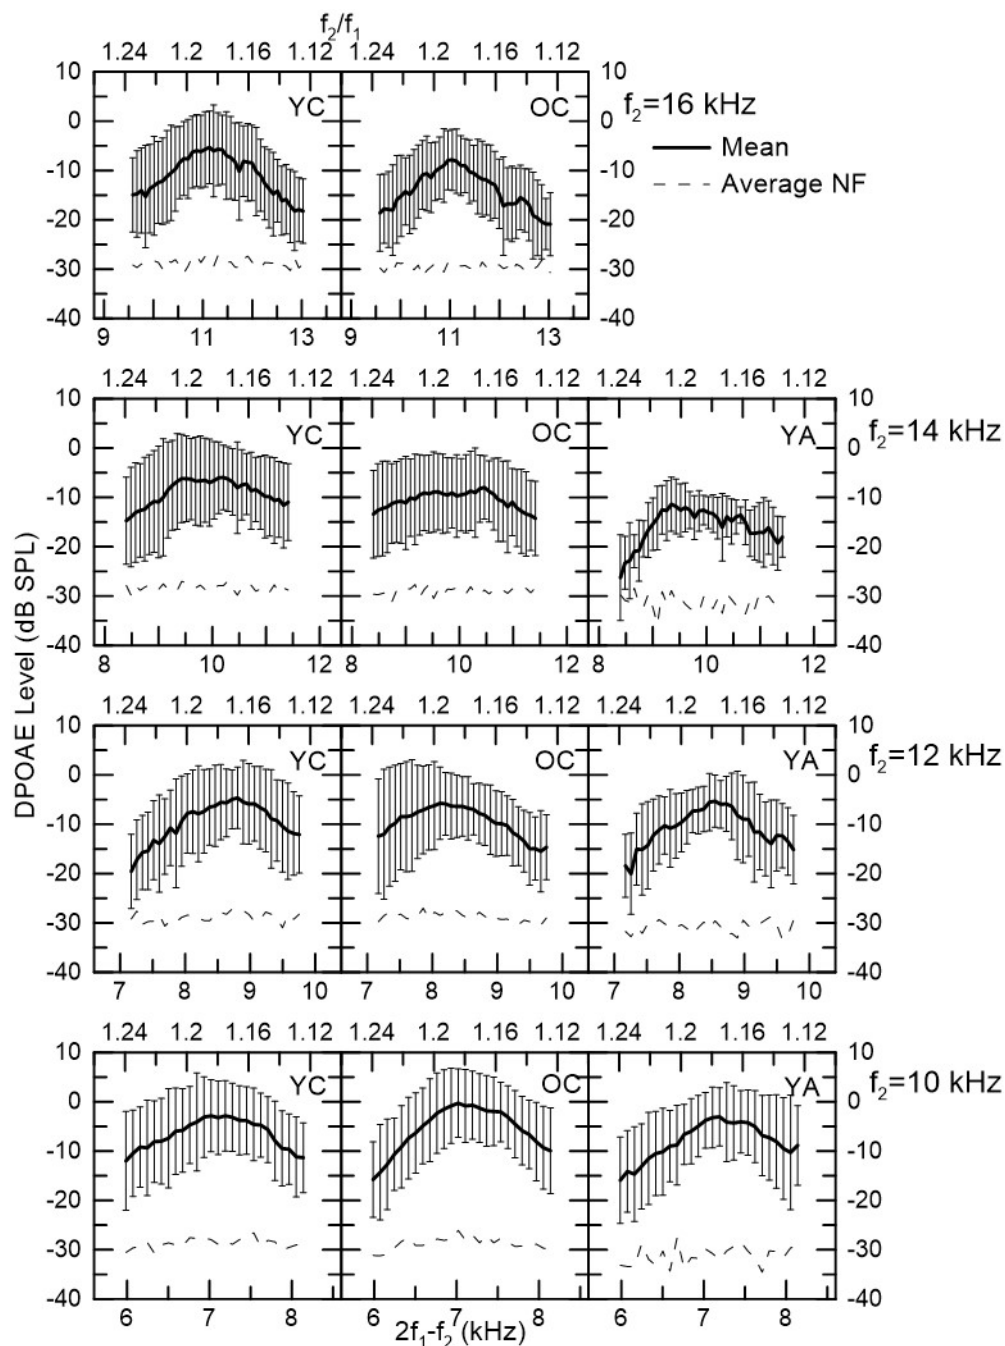

### Supplemental Material S1. Mean DPOAE levels for high frequencies.

Each row represents a different frequency ( $f_2 = 16$  kHz in top row, 10 kHz bottom row) with  $f_1$  varied from 1.1 to 1.25 for the mean DPOAE levels (solid black line) for young children (YC, left column), older children (OC, middle column), and young adults (YA, right column). Spread of the data is indicated by the vertical bars ( $\pm 1$  standard deviation) for each mean value and the dashed line represents the average noise floor.
