# Supplementary material
Source: publisher figshare collection journal article supplement (https://asha.figshare.com/articles/dataset/_/23669214)
Supplement: Supplementary file 4 [file 1]

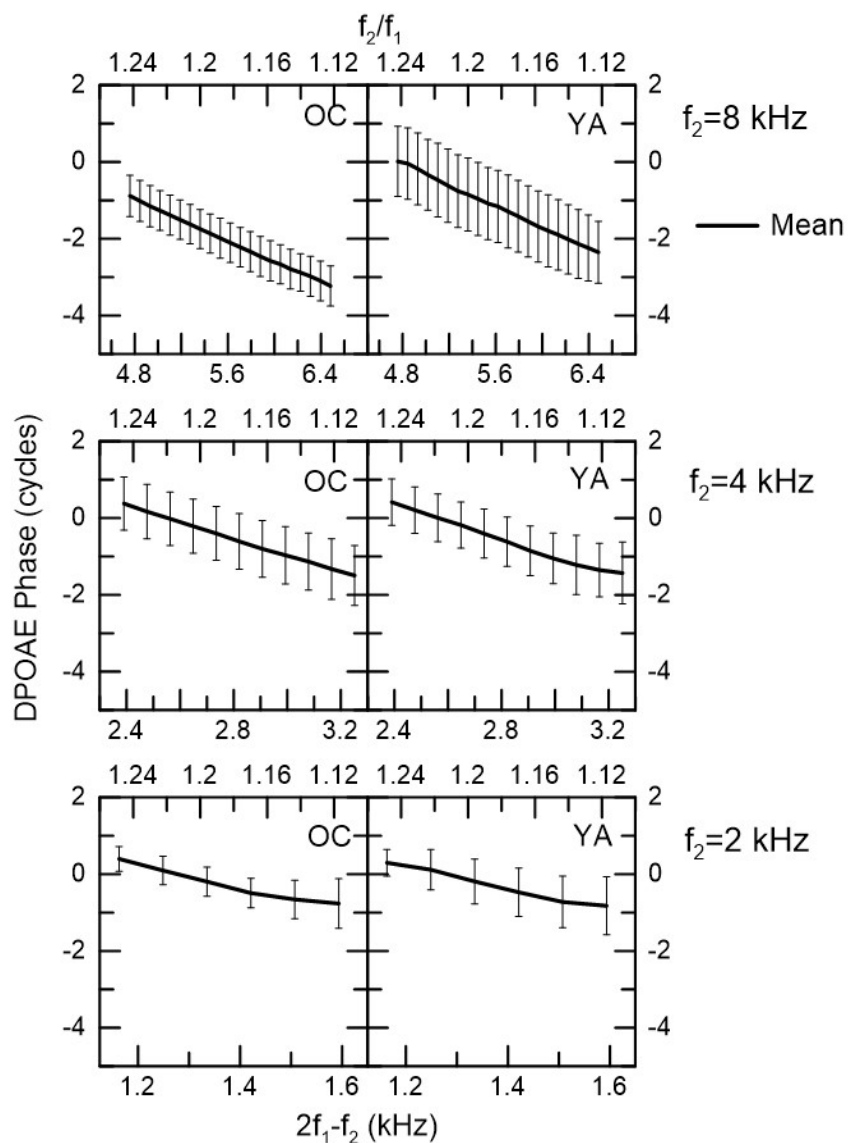

**Supplemental Material S4.** Mean DPOAE phase for conventional frequencies.

This is the same as Supplemental Material S3 except for conventional frequencies with  $f_2 = 8$  kHz in the top row and 2 kHz in the bottom row.
